# Supplementary material for: Differential Susceptibility to Hypertension Is Due to Selection during the Out-of-Africa Expansion
Source: PubMed Central journal article supplement (PMC1342636; doi:10.1371/journal.pgen.0010082), 2005-12-30

**B**

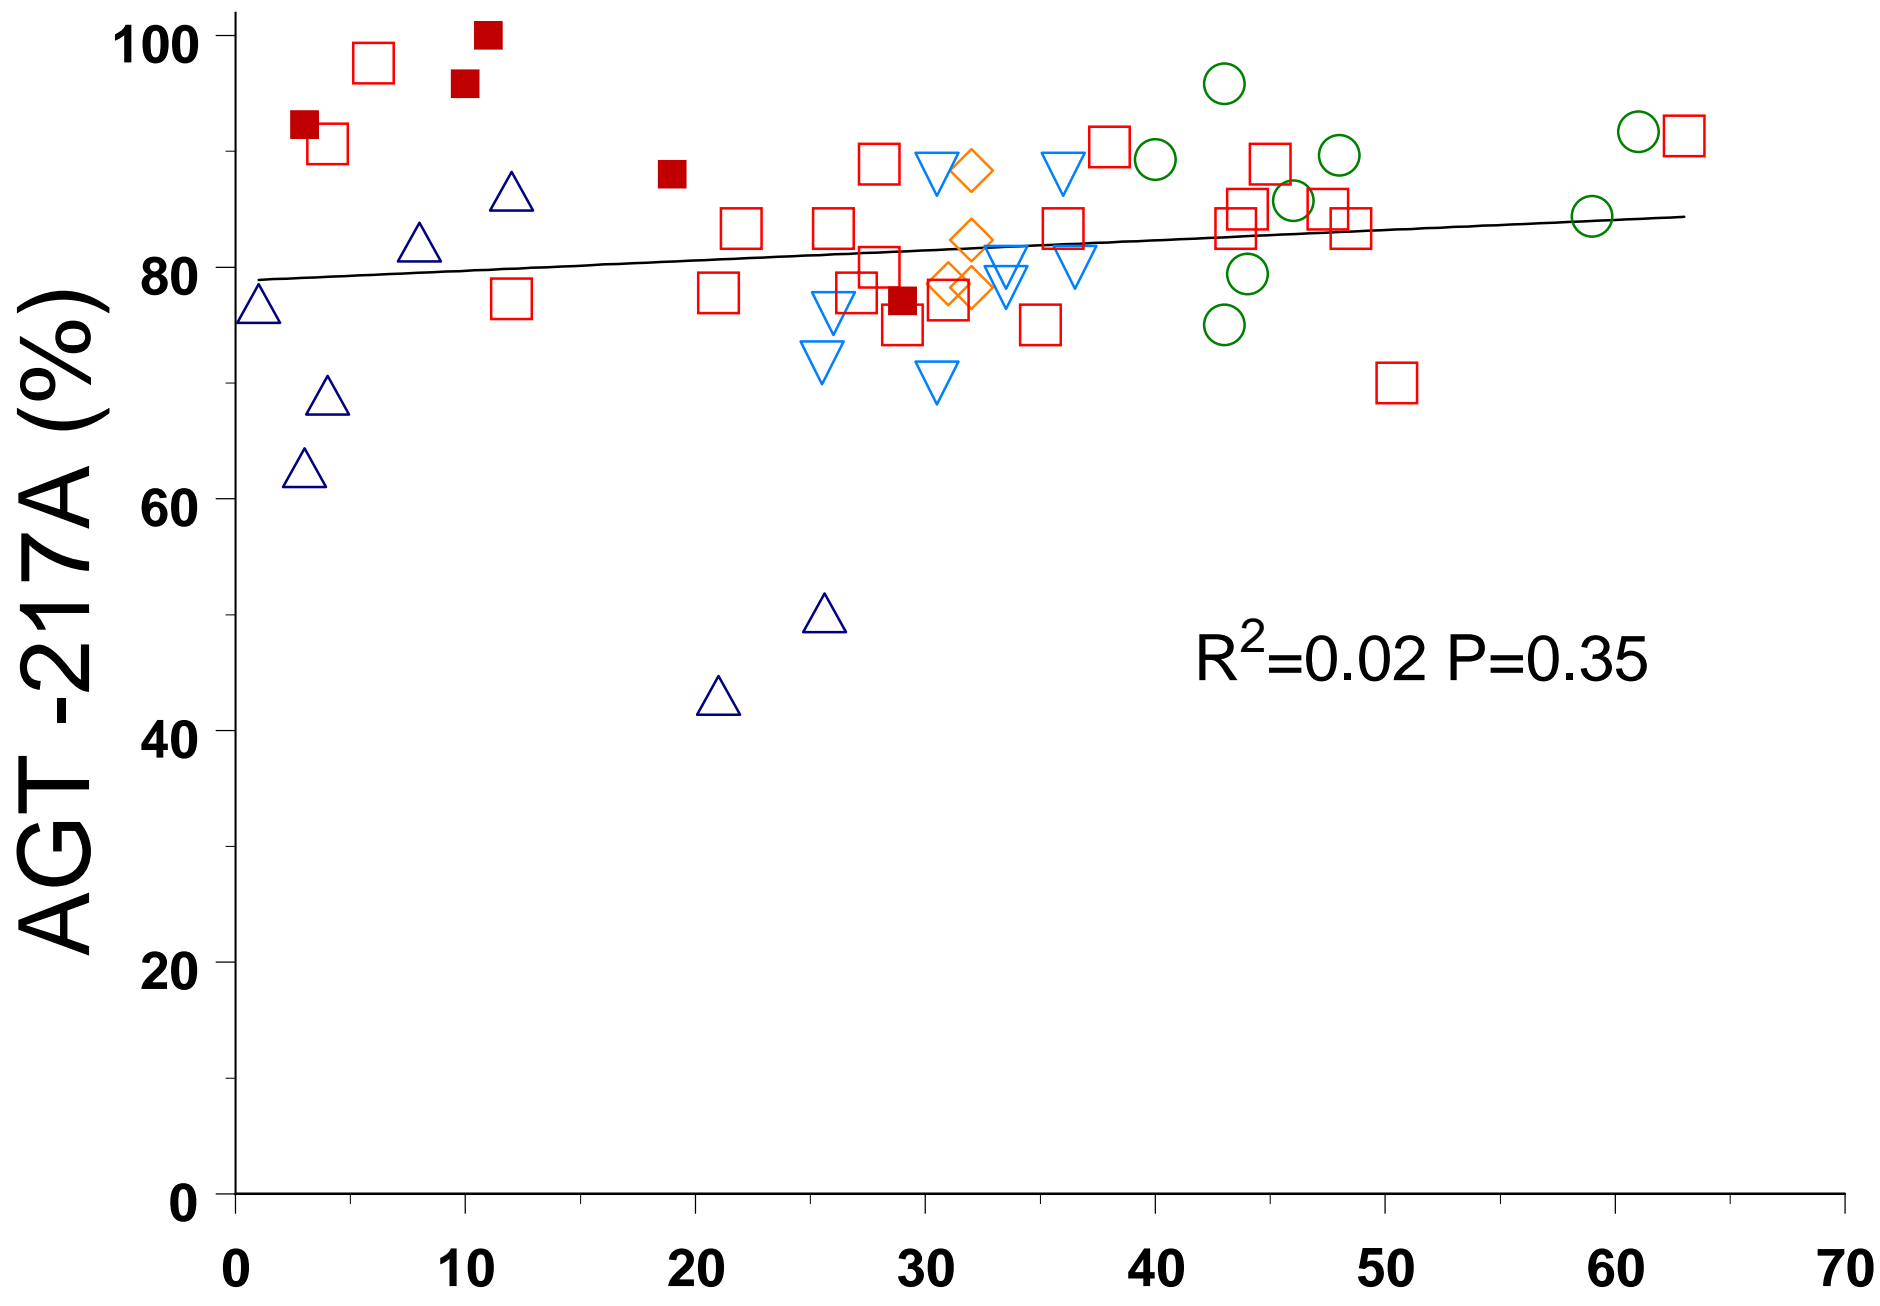

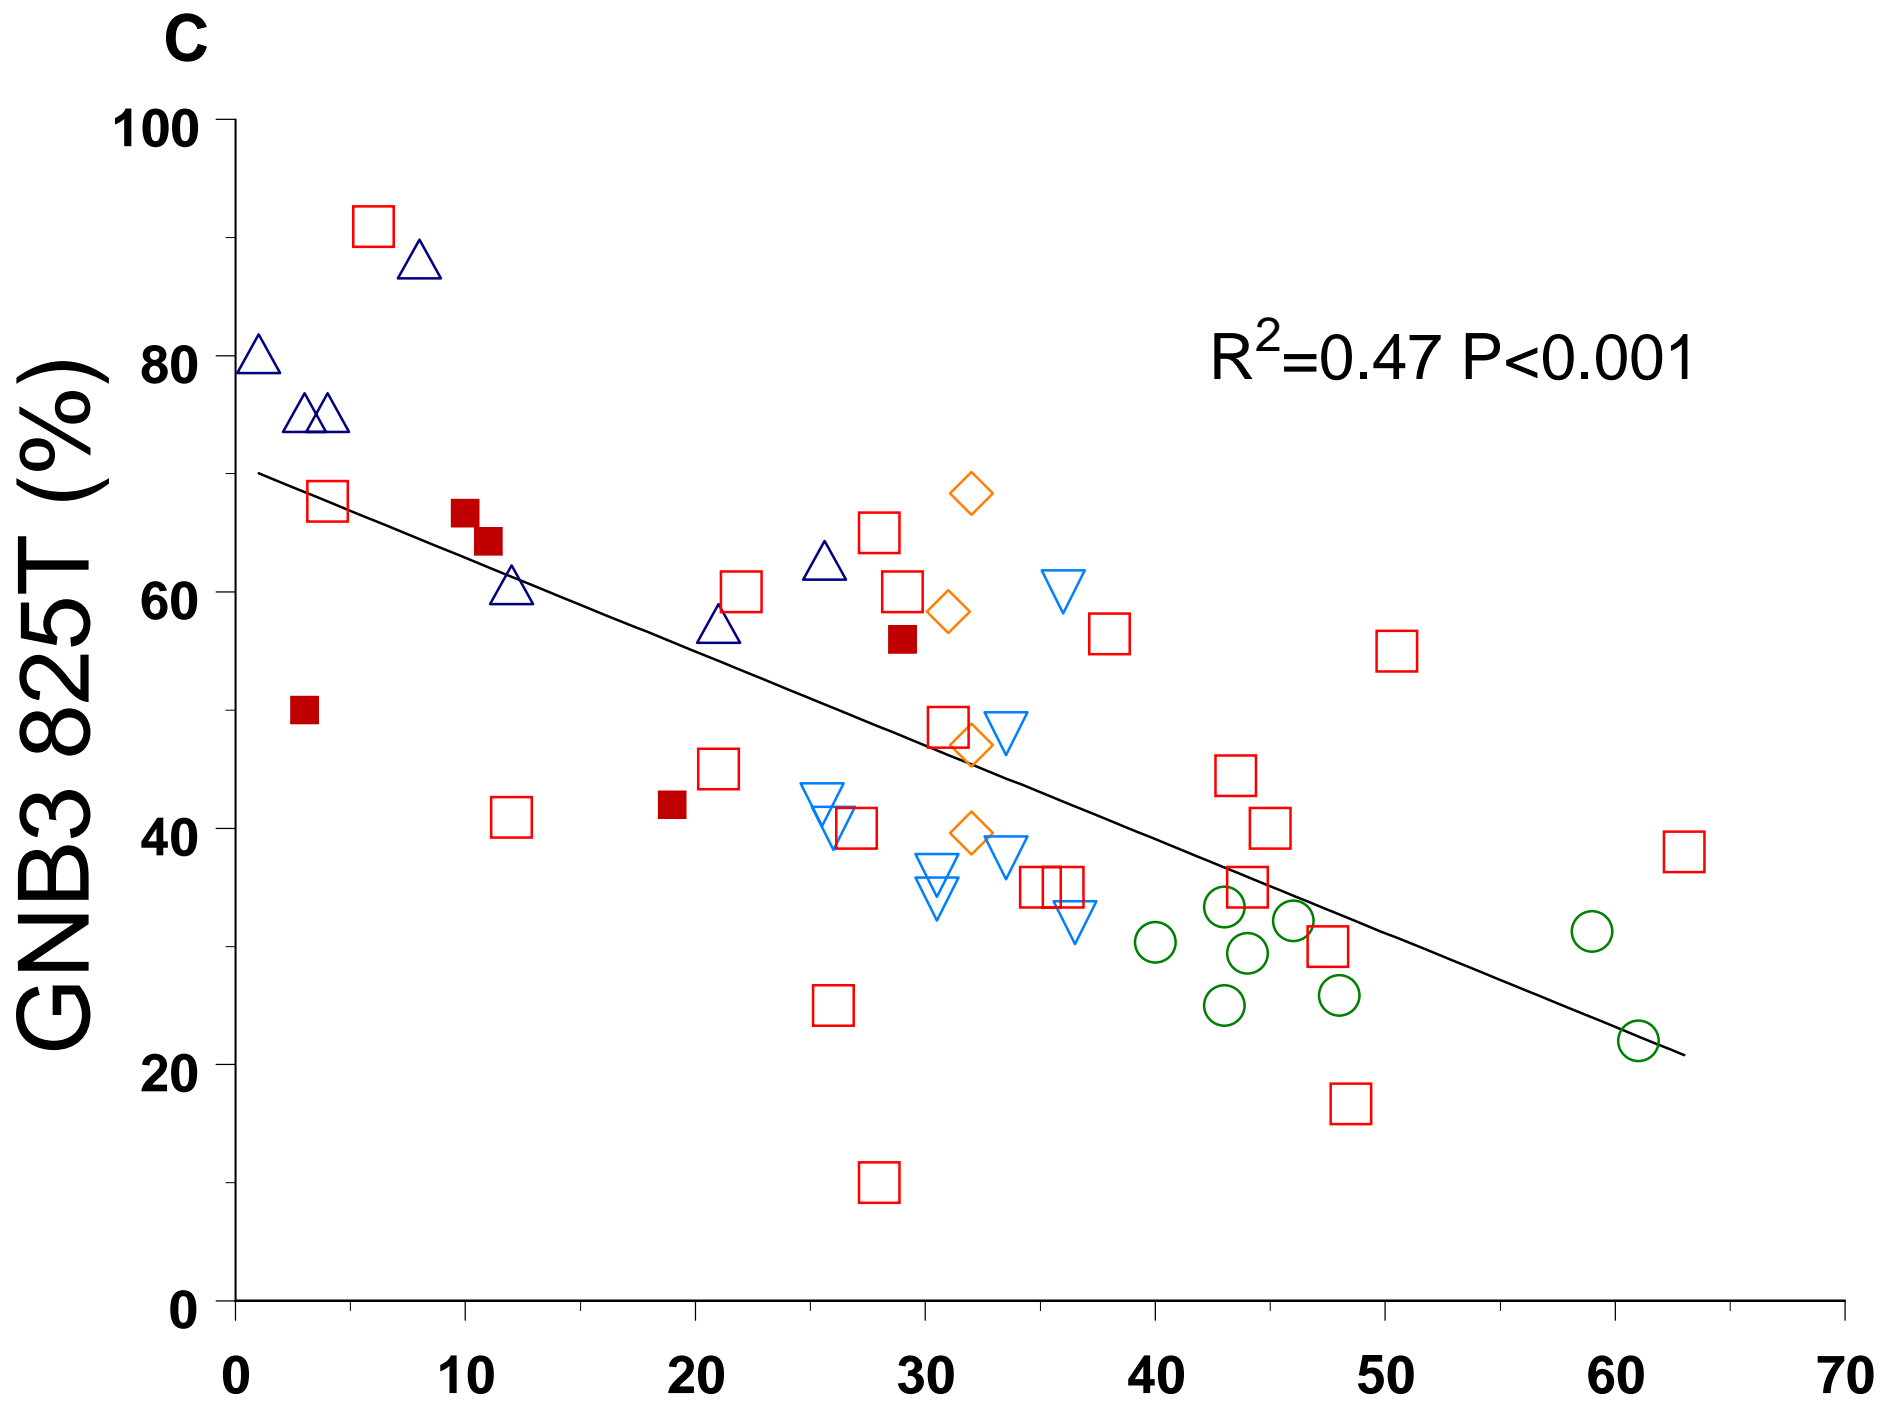

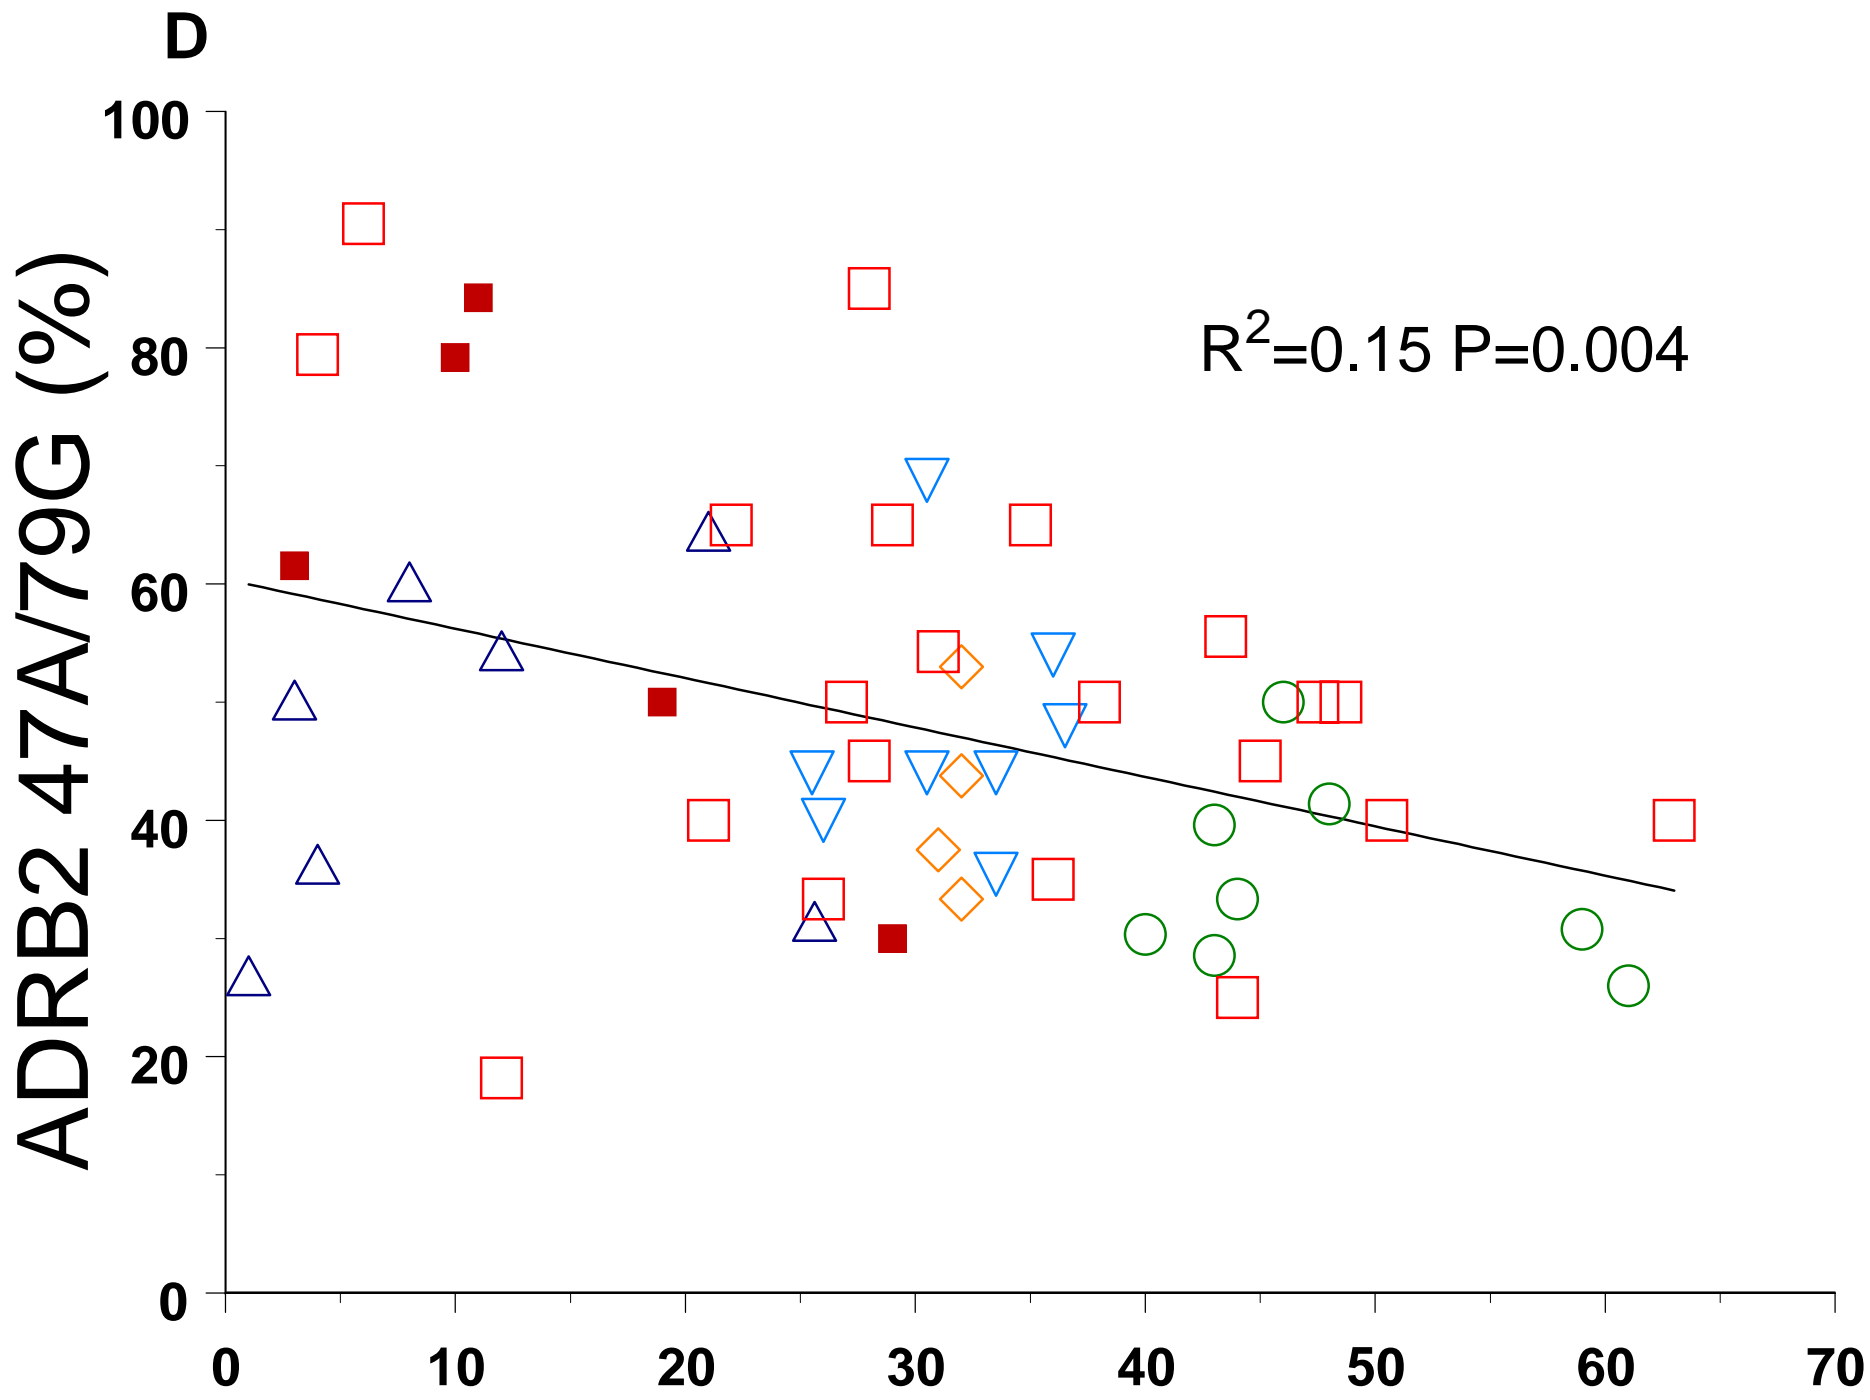

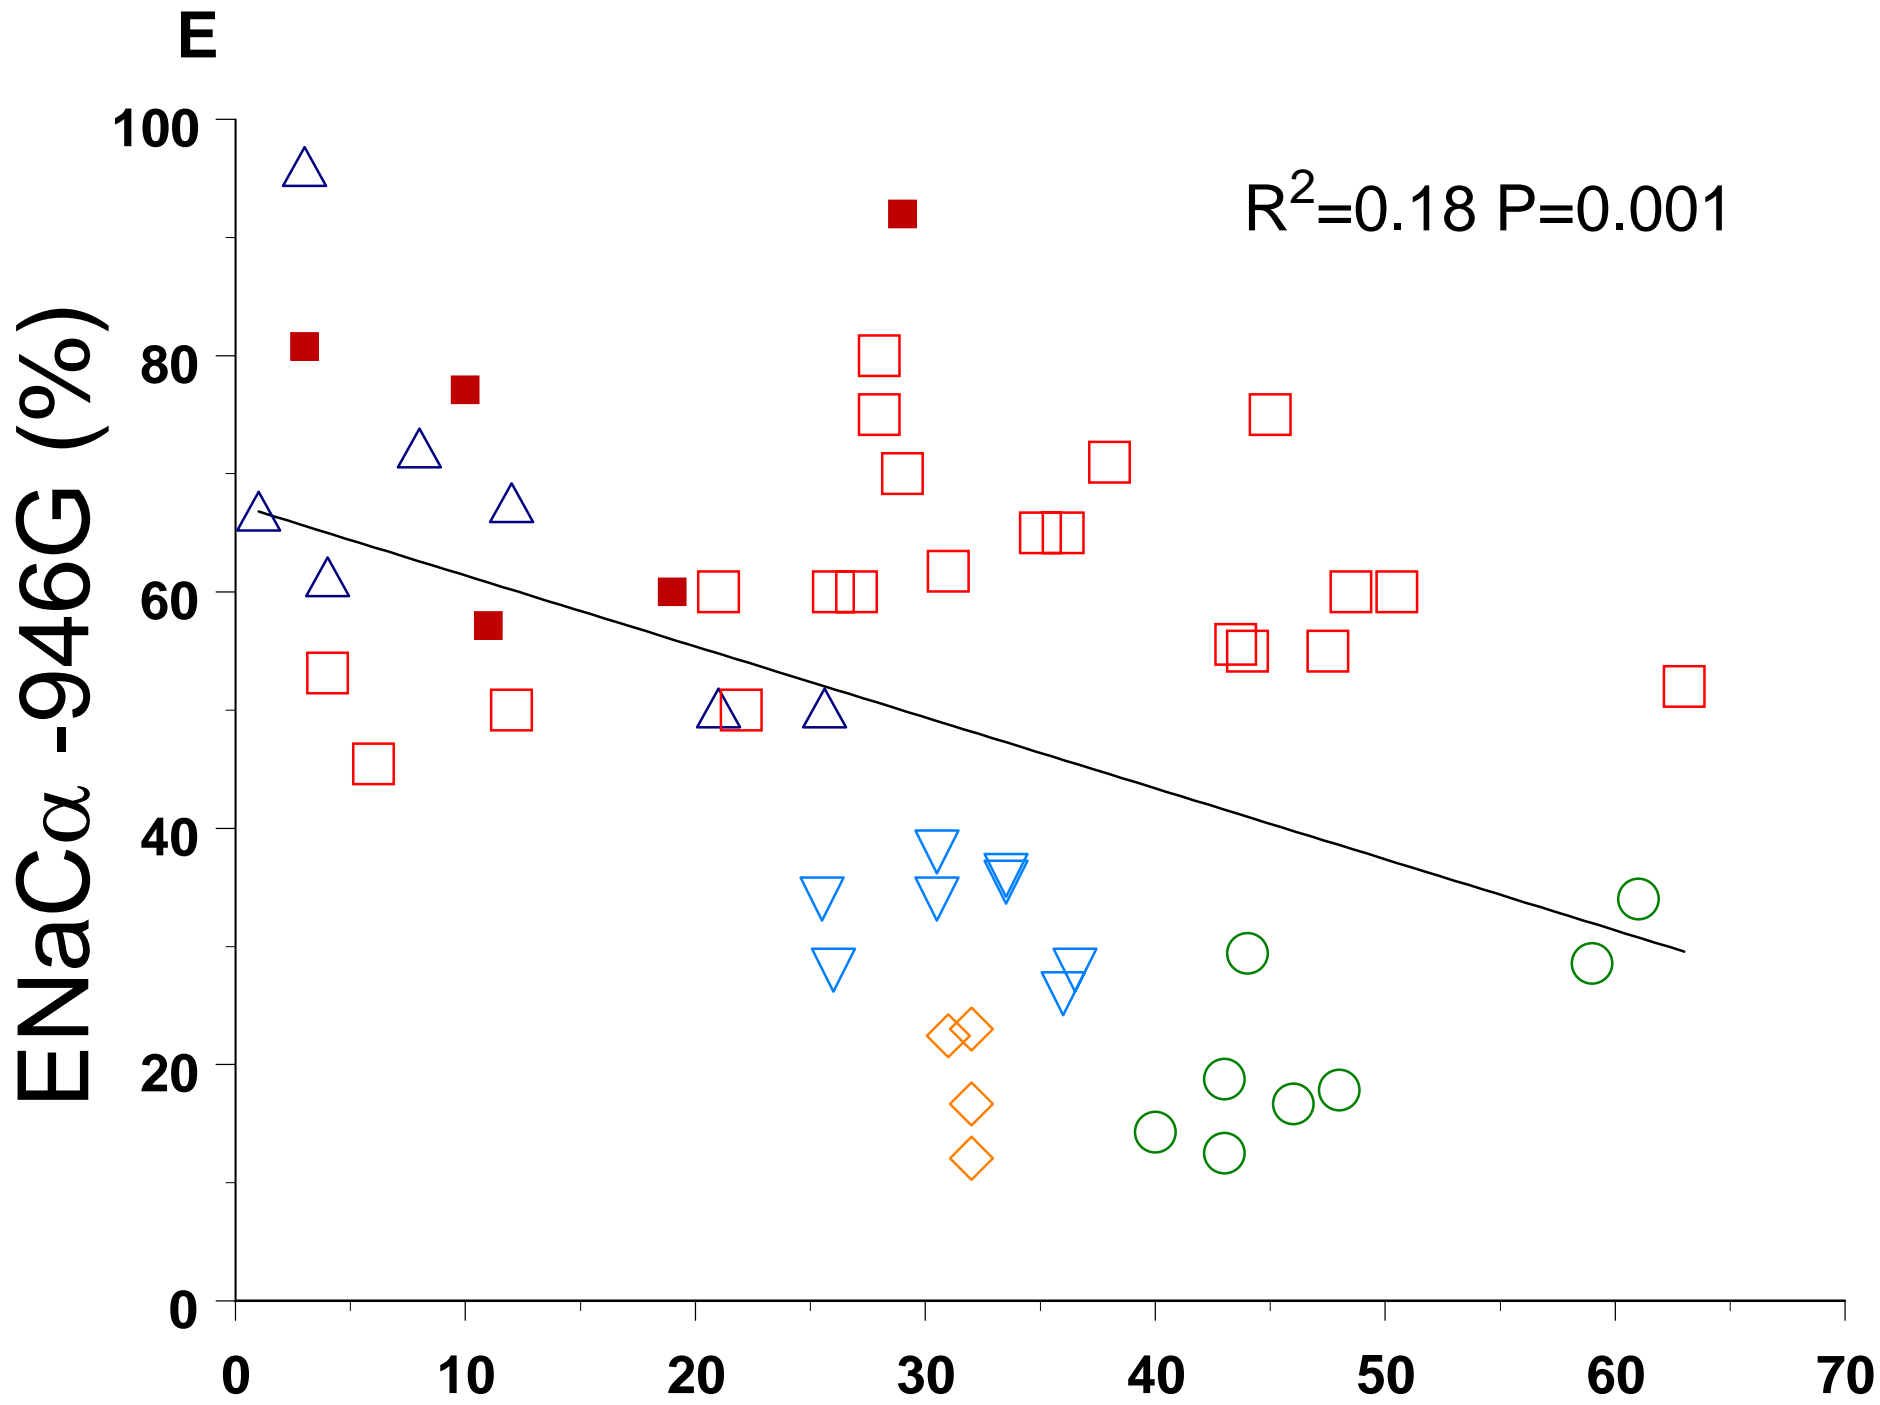

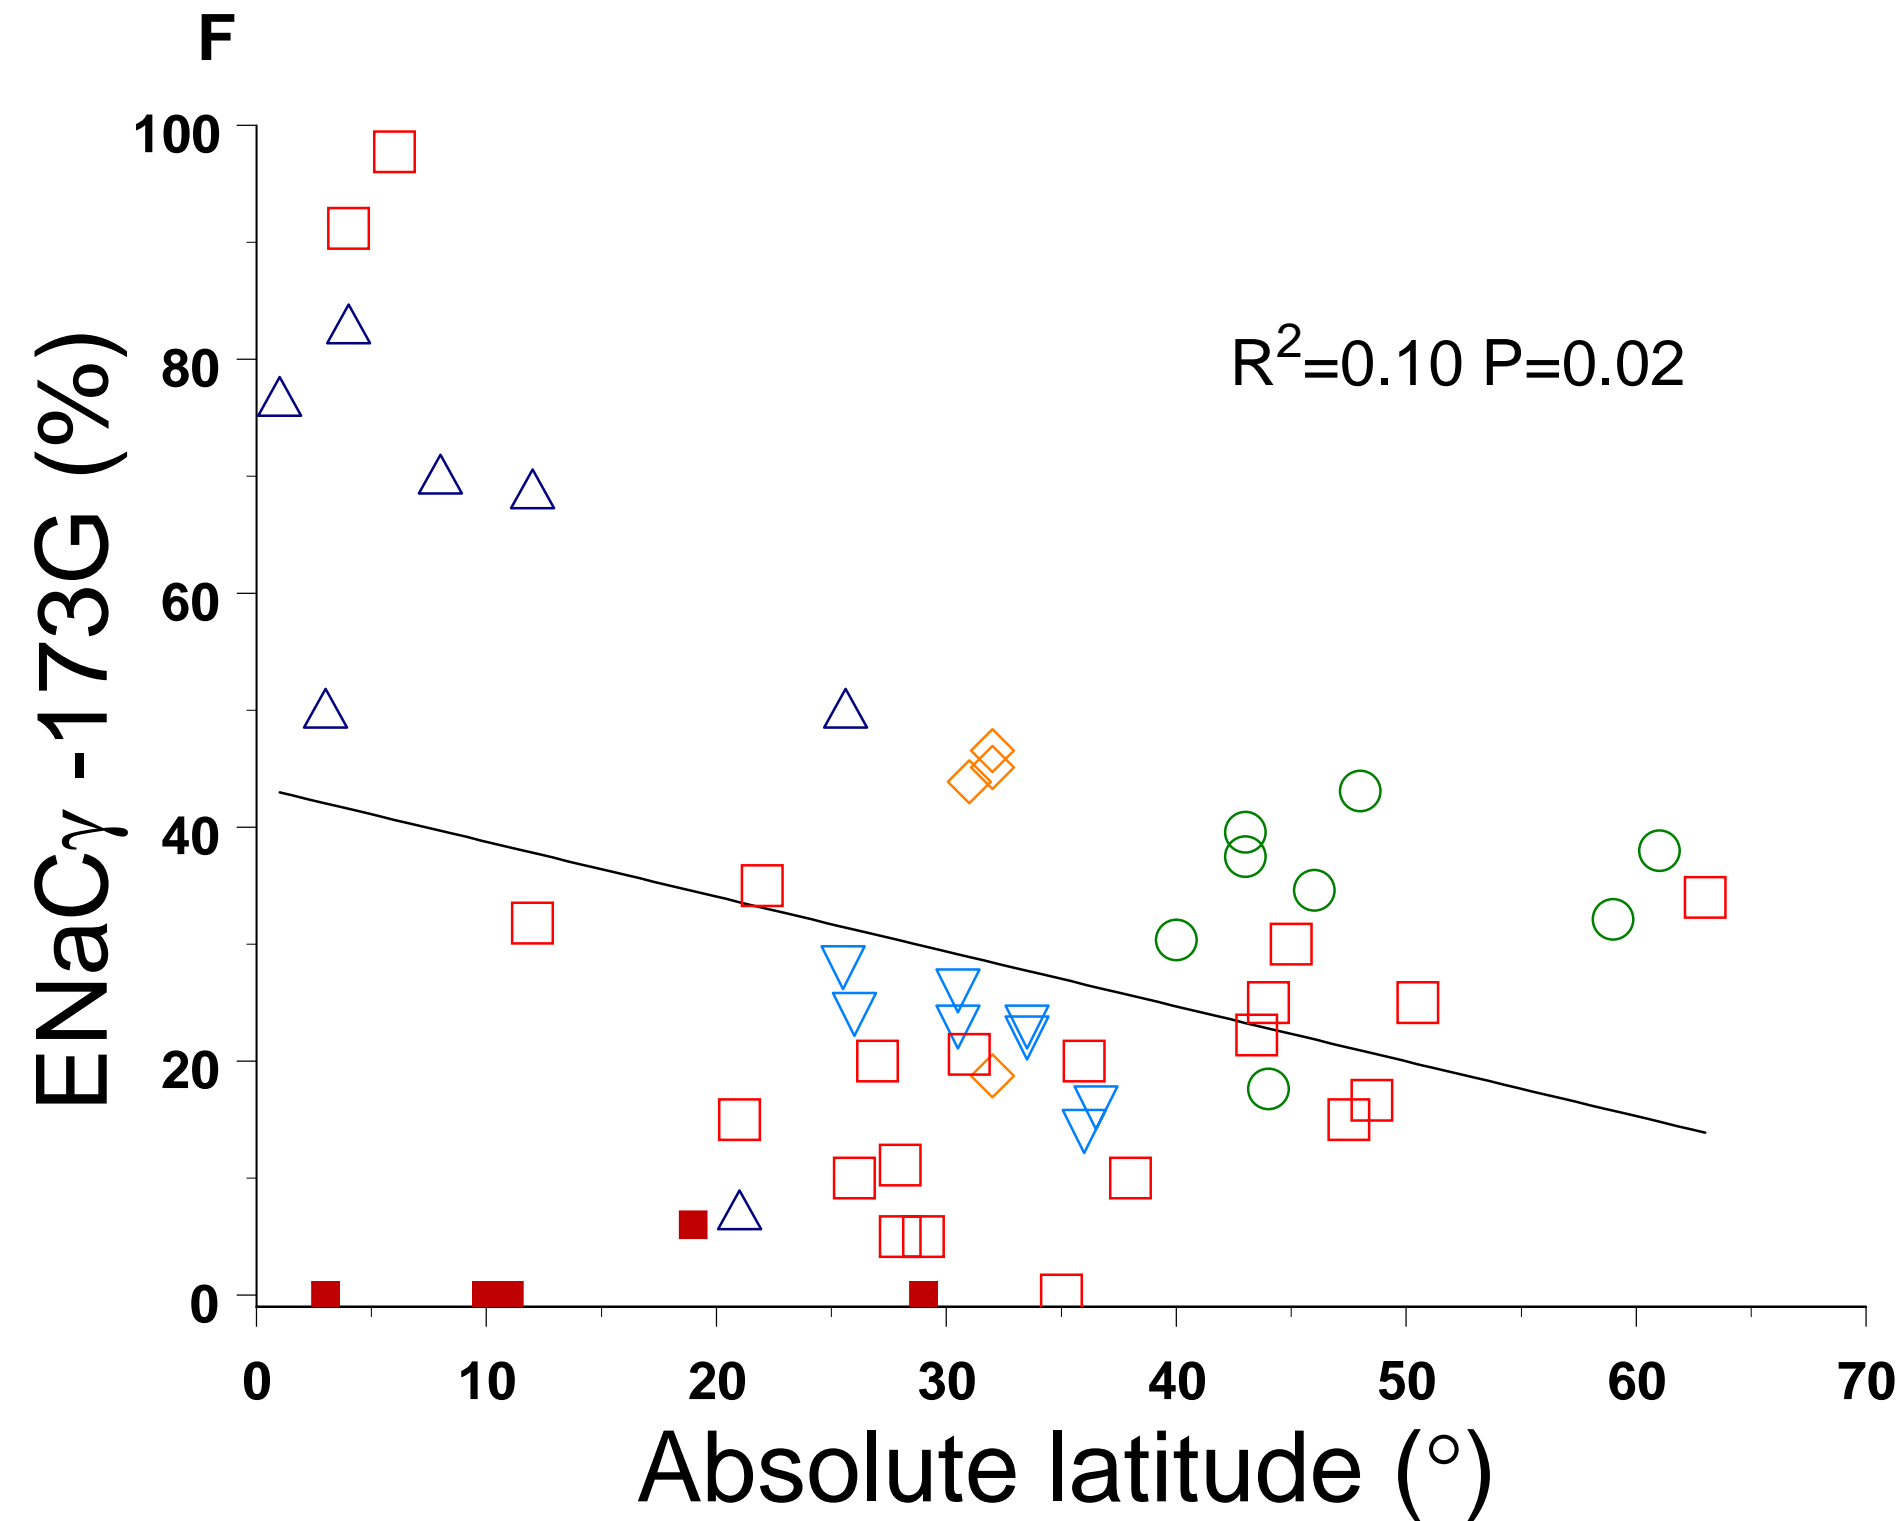

Supplement: pgen.0010082.sg002.pdf [file pgen.0010082.sg002.pdf]
